# Supplementary material for: Curing kinetics, thermal and mechanical properties of TDE-85 modified by bicyclo-benzoxazine
Source: Royal Society of Chemistry journal article supplement (doi:10.1039/c6ra15126d), 2016-01-01
Supplement: c6ra15126d1.pdf [file c6ra15126d1.pdf]

Supplementary Information

**Curing kinetics, thermal and mechanical properties of TDE-85 modified by bicyclo-benzoxazine**

Dandan Zhang, Rumin Wang\*, Shameel Farhan, Hao Jiang, Ningning Wang, Liu Yuan

*Department of Applied Chemistry, School of Science, Northwestern Polytechnical University, Xi'an, 710072, P. R. China*

**Supplement:**

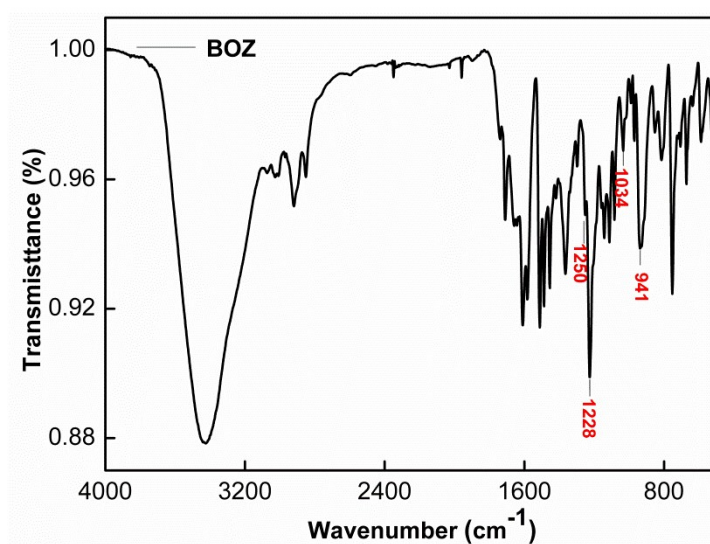

Fig. S1 FTIR spectrum of BOZ

---

\* Correspondence to: Rumin Wang; E-mail: [rmwang@nwpu.edu.cn](mailto:rmwang@nwpu.edu.cn)  
ShameelFarhan; E-mail: [shameelfarhan@yahoo.com](mailto:shameelfarhan@yahoo.com)

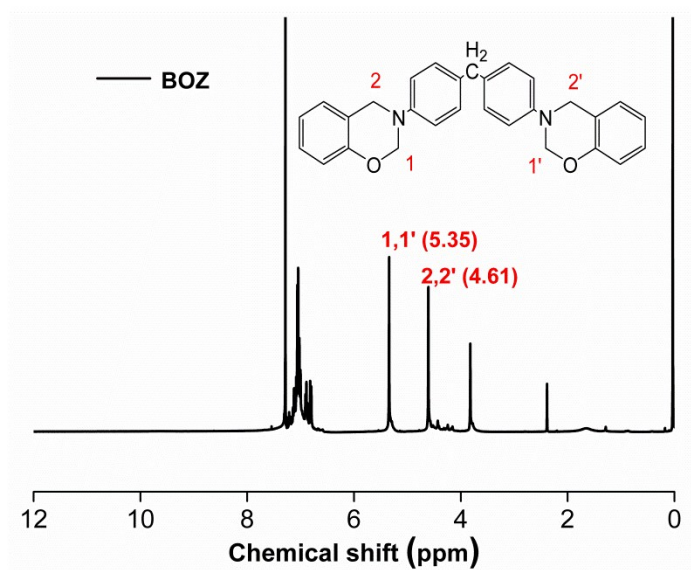

Fig. S2 <sup>1</sup>H-NMR spectrum of BOZ

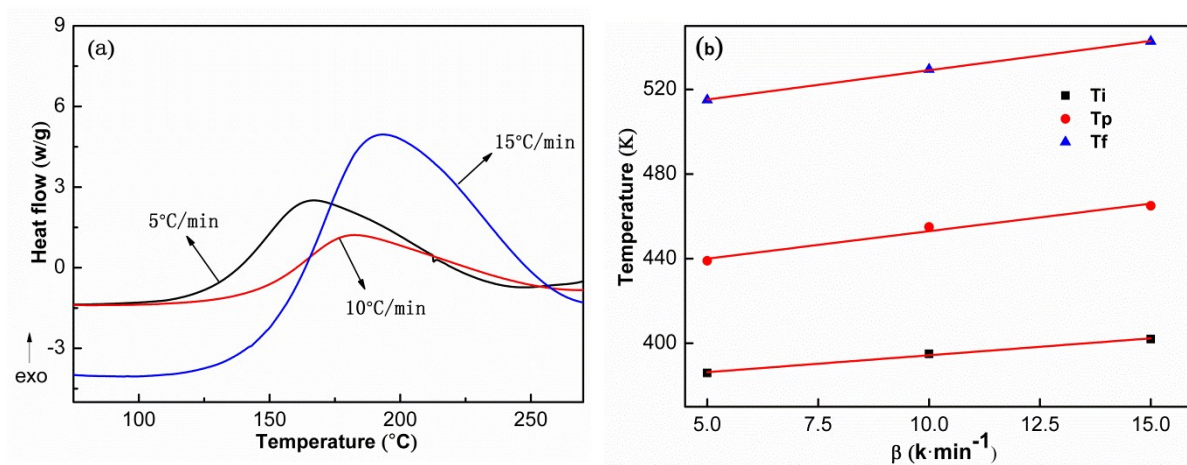

Fig. S3 (a) DSC curves of BOZ/DDS/TDE-85 systems at different scanning rates and (b) Plots of T versus  $\beta$ .

Table S1 DSC data at different scanning rates

| $\beta$ (K·min <sup>-1</sup> ) | $T_i$ (K) | $T_p$ (K) | $T_f$ (K) |
|--------------------------------|-----------|-----------|-----------|
| 5                              | 386.1     | 438.9     | 514.1     |
| 10                             | 394.3     | 455.3     | 529.5     |
| 15                             | 401.9     | 465.2     | 542.6     |

Table S2 Kinetic parameters for curing reaction of 5 phr BOZ/DDS/TDE-85 systems

| Method           | Equation of linear plot                           | Activation energy $E_a$ (kJ/mol) | Pre-exponential factor $A$ |
|------------------|---------------------------------------------------|----------------------------------|----------------------------|
| Kissinger's      | $-\ln(\beta/T_p^2) = 7335 \times (1/T_p) - 2.048$ | 61.0                             | $5.68 \times 10^4$         |
| Flynn-Wall-Ozawa | $\ln\beta = -8269 \times (1/T_p) + 16.34$         | 65.3                             |                            |

(a)

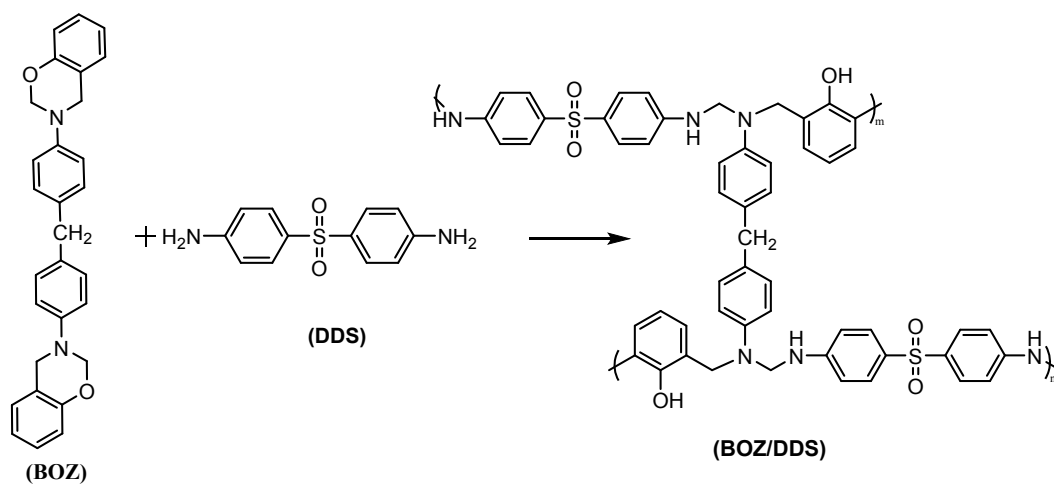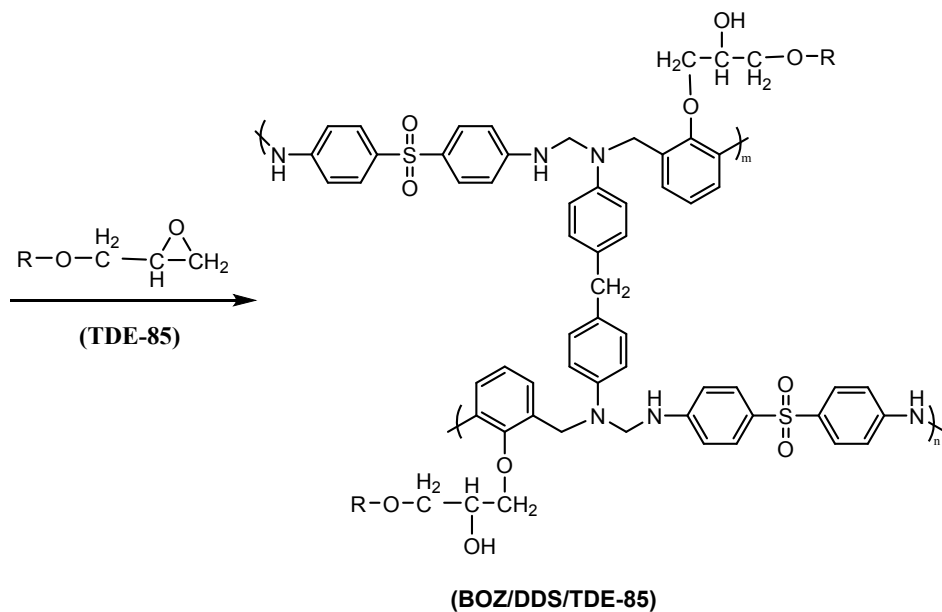

(b)

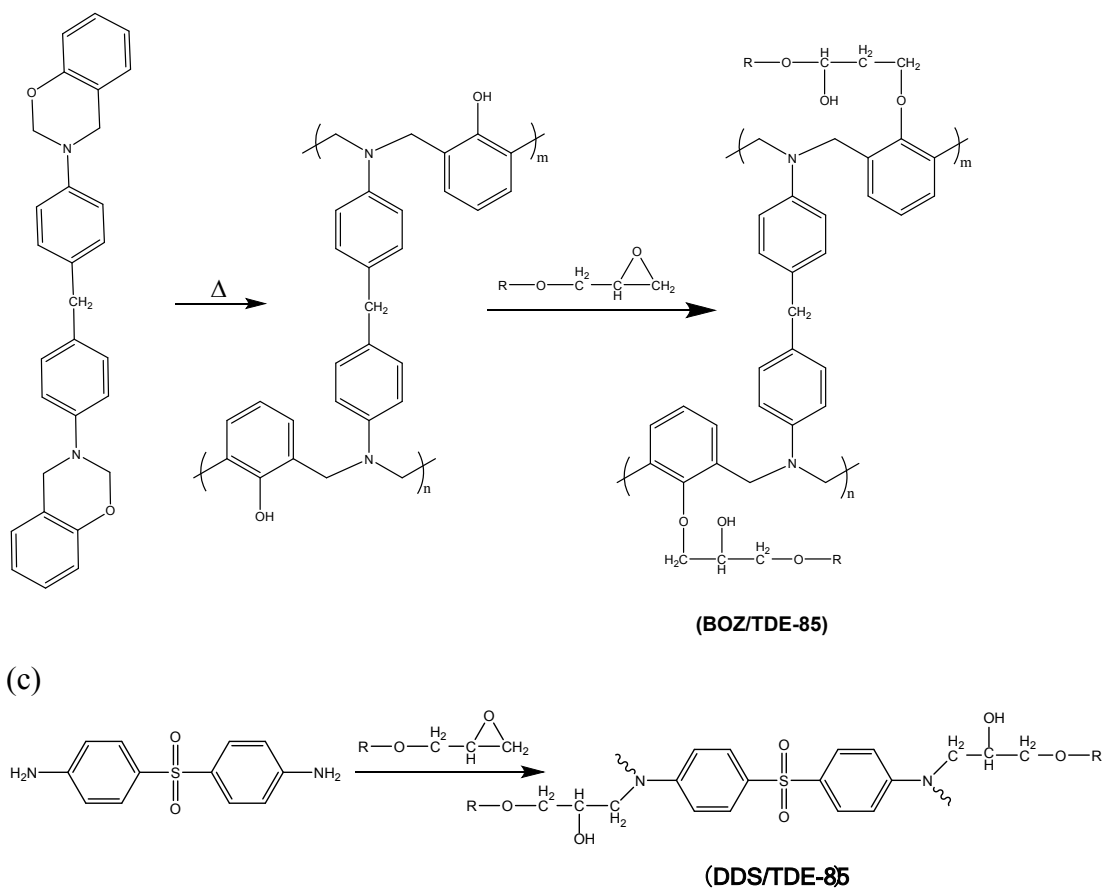

Fig. S4 Proposed curing reaction mechanism of BOZ, DDS and TDE-85: (a) BOZ/DDS/TDE-85 (b) BOZ/TDE-85 and (c) TDE-85/DDS.

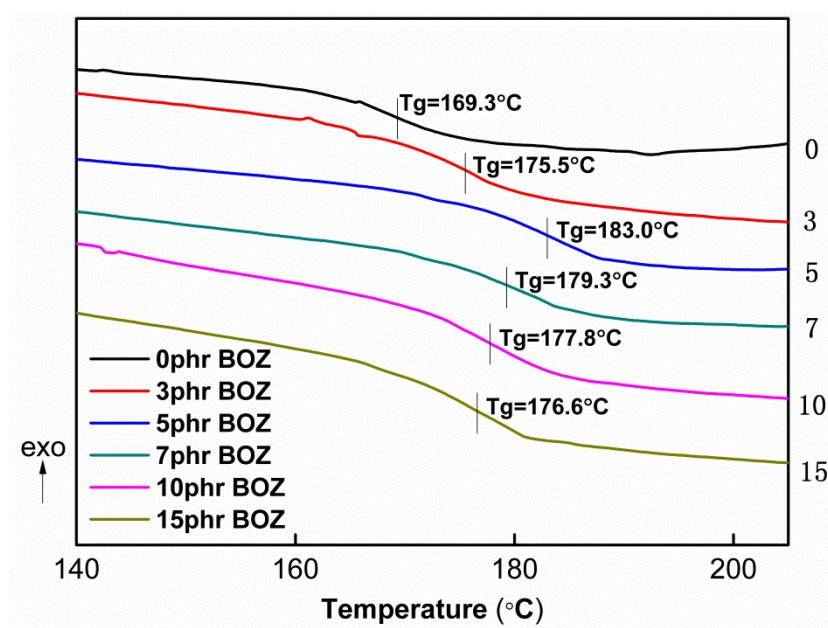

Fig. S5 DSC curves for the cured BOZ/DDS/TDE-85 systems with different content of BOZ.

Table S3 TGA data of TDE-85cured with DDS and BOZ

| BOZ content (phr) | $T_{5\%}$ (°C) | $T_{10\%}$ (°C) | Char yield at 600°C (%) |
|-------------------|----------------|-----------------|-------------------------|
| 0                 | 314            | 335             | 20.8%                   |
| 5                 | 315            | 337             | 21.5%                   |
| 7                 | 312            | 333             | 24.7%                   |

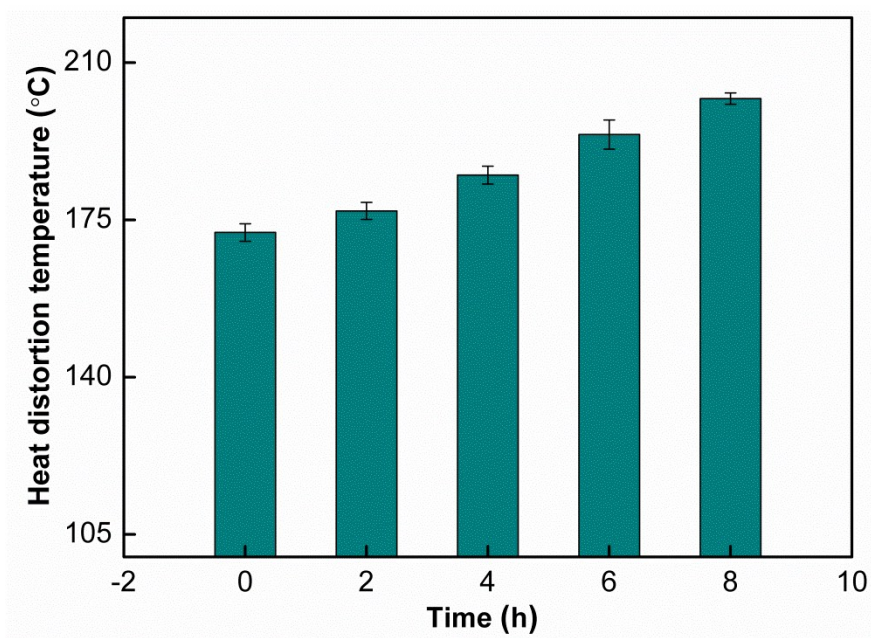

Fig. S6 HDT of 5 phr BOZ/DDS/TDE-85 systems disposed at different times under 200°C.
